# Supplementary material for: Three-Dimensional Comparison of the Maxillary Surfaces through ICP-Type Algorithm: Accuracy Evaluation of CAD/CAM Technologies in Orthognathic Surgery
Source: MDPI journal article supplement (doi:10.3390/ijerph191811834), 2022-09-19
Supplement: s1 [file s1]

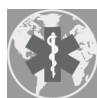

## Supplementary Materials

**Supplementary Table S1.** Patient information included in the study.

| Patient | Gender | Age<br>(M: 29,7) | MMD     | Surgical Treatment | CAD/CAM System | Type of Osteotomy |
|---------|--------|------------------|---------|--------------------|----------------|-------------------|
| 1       | F      | 33               | III, CH | 1, 2, 3            | P              | MO                |
| 2       | F      | 32               | II, OB  | 1, 2               | P              | SO                |
| 3       | M      | 53               | III, CH | 1, 2, 3            | P              | MO                |
| 4       | M      | 27               | II, OB  | 1,2, 4             | P              | MO                |
| 5       | M      | 26               | II      | 1, 2               | P              | SO                |
| 6       | F      | 25               | II, OB  | 1, 2               | S              | SO                |
| 7       | M      | 23               | III     | 1, 2, 4            | S              | MO                |
| 8       | F      | 19               | III     | 1, 2               | S              | MO                |
| 9       | F      | 32               | III     | 1, 2               | S              | SO                |
| 10      | M      | 27               | III, CH | 1, 2, 3, 4         | S              | MO                |

Legend: MMD (Maxillo-Mandibular Disease): II = Class II malocclusion, III = Class III malocclusion, OB = Open-Bite, CH = condylar hyperplasia; Surgical treatment: 1 = Le Fort I osteotomy, 2 = bilateral sagittal split osteotomy, 3 = condilectomy, 4 = genioplasty; CAD/CAM system: P = PSIs (Splintless-cutting guides and custom-made plates); S = occlusal splints; Type of Maxillary Osteotomy: MO = monobloc (Le Fort I), SO = segmental osteotomy.

**Supplementary Table S2.** Summary of the 3D comparison (RMSE) in the three groups analyzed.

|                            | Splintless (RMSE) | SD    | Splint (RMSE) | SD    | <i>p</i> -Value |
|----------------------------|-------------------|-------|---------------|-------|-----------------|
| <b>Total</b>               | 1.2167            | 0.456 | 1.633         | 0.303 | 0.09            |
| <b>Monobloc Osteotomy</b>  | 0.9194            | 0.062 | 1.7839        | 0.311 | <b>0.02</b>     |
| <b>Segmental Osteotomy</b> | 1.6627            | 0.405 | 1.4068        | 0.069 | 0.23            |
